# Supplementary material for: SPE–UPLC–MS/MS for Determination of 36 Monomers of Alkylphenol Ethoxylates in Tea
Source: MDPI journal article supplement (doi:10.3390/molecules28073216), 2023-04-04
Supplement: s1 [file s1]

---

## Supplementary Material

# SPE-UPLC-MS/MS for Determination of 36 Monomers of Alkylphenol Ethoxylates in Tea

Lin Qin <sup>1</sup>, Qin Yujie, Sun Hezhi, Wang Xinru, Yang Mei, Zhang Xinzong, Zhou Li <sup>1\*</sup>, Luo Fengjian<sup>1\*</sup>

<sup>1</sup> Tea Research Institute, Chinese Academy of Agricultural Sciences, Hangzhou 310008, China

\* Correspondence: lizhou@tricaas.com, +86-571-86653171; lfj@tricaas.com, +86-571-86650624

## Contents

**Table S1.** Mass spectrometric parameters for monitoring OPEO<sub>3-20</sub> and NPEO<sub>3-20</sub>.

**Table S2.** Validated parameters of APEO<sub>3-20</sub> in spiked tea samples.

**Figure S1.** Full-scan mass spectra of (A) OPEO (9-10) ( $n_{EO} = 3-15$ ), (B) OPEO (16) ( $n_{EO} = 9-20$ ), (C) NPEO (4) ( $n_{EO} = 9-11$ ), (D) NPEO (9-10) ( $n_{EO} = 3-15$ ), and (E) NPEO (14) ( $n_{EO} = 6-20$ ) in 5 mg/kg standards.

**Figure S2.** Chromatograms of (A) NPEO<sub>17</sub> and NPEO<sub>19</sub> combined two ammonium ions, and (B) NPEO<sub>17</sub> and NPEO<sub>19</sub> combined one ammonium ion.

**Figure S3.** Multiple reaction-monitoring chromatograms of HPLC-MS/MS for blank tea samples spiked at the middle concentration of OPEOs and NPEOs.

**Table S1.** Mass spectrometric parameters for monitoring OPEO<sub>3-20</sub> and NPEO<sub>3-20</sub>.

| Analyte            | Retention time | Precursor ion (m/z) | Product Ion (m/z) | Cone Voltage (V) | Collision voltage ( V) | Analyte            | Retention time | Precursor ion (m/z) | Product Ion (m/z) | Cone Voltage (V) | Collision voltage ( V) |
|--------------------|----------------|---------------------|-------------------|------------------|------------------------|--------------------|----------------|---------------------|-------------------|------------------|------------------------|
| OPEO <sub>3</sub>  | 6.11           | 356.3               | 227.2*            | 15               | 10                     | NPEO <sub>3</sub>  | 6.77           | 370.1               | 121.3*            | 30               | 30                     |
|                    |                |                     | 121.2             |                  | 15                     |                    |                |                     | 227.1             |                  | 10                     |
| OPEO <sub>4</sub>  | 6.11           | 400.3               | 271.2             | 15               | 25                     | NPEO <sub>4</sub>  | 6.77           | 414.1               | 397.2*            | 30               | 10                     |
|                    |                |                     | 383.2*            |                  | 10                     |                    |                |                     | 270.9             |                  | 15                     |
| OPEO <sub>5</sub>  | 6.11           | 444.3               | 427.3*            | 15               | 14                     | NPEO <sub>5</sub>  | 6.77           | 458.1               | 315.0*            | 30               | 15                     |
|                    |                |                     | 315.3             |                  | 16                     |                    |                |                     | 441.6             |                  | 10                     |
| OPEO <sub>6</sub>  | 6.10           | 488.3               | 89.1*             | 22               | 29                     | NPEO <sub>6</sub>  | 6.76           | 502.2               | 133.1*            | 30               | 18                     |
|                    |                |                     | 471.4             |                  | 15                     |                    |                |                     | 485.4             |                  | 15                     |
| OPEO <sub>7</sub>  | 6.08           | 532.4               | 89.1*             | 25               | 30                     | NPEO <sub>7</sub>  | 6.74           | 546.3               | 529.1             | 30               | 15                     |
|                    |                |                     | 515.3             |                  | 15                     |                    |                |                     | 132.9*            |                  | 28                     |
| OPEO <sub>8</sub>  | 6.06           | 576.4               | 89.1*             | 25               | 30                     | NPEO <sub>8</sub>  | 6.71           | 590.3               | 291.1             | 30               | 26                     |
|                    |                |                     | 133.2             |                  | 25                     |                    |                |                     | 133.3*            |                  | 30                     |
| OPEO <sub>9</sub>  | 6.04           | 620.4               | 89.1*             | 23               | 40                     | NPEO <sub>9</sub>  | 6.68           | 634.4               | 291.1             | 30               | 30                     |
|                    |                |                     | 133.2             |                  | 28                     |                    |                |                     | 133.3*            |                  | 30                     |
| OPEO <sub>10</sub> | 6.01           | 664.4               | 89.1              | 25               | 40                     | NPEO <sub>10</sub> | 6.65           | 678.5               | 291.1*            | 30               | 30                     |
|                    |                |                     | 133.2*            |                  | 28                     |                    |                |                     | 133.3             |                  | 30                     |
| OPEO <sub>11</sub> | 5.99           | 708.5               | 89.1*             | 25               | 40                     | NPEO <sub>11</sub> | 6.62           | 722.4               | 177.1             | 50               | 30                     |
|                    |                |                     | 133.2             |                  | 30                     |                    |                |                     | 133.2*            |                  | 30                     |
| OPEO <sub>12</sub> | 5.97           | 752.5               | 89.1*             | 25               | 40                     | NPEO <sub>12</sub> | 6.60           | 766.6               | 290.6             | 30               | 30                     |
|                    |                |                     | 133.2             |                  | 30                     |                    |                |                     | 132.7*            |                  | 30                     |
| OPEO <sub>13</sub> | 5.94           | 796.6               | 89.1*             | 25               | 40                     | NPEO <sub>13</sub> | 6.56           | 810.6               | 793.2             | 30               | 20                     |
|                    |                |                     | 277.2             |                  | 30                     |                    |                |                     | 133.4*            |                  | 38                     |
| OPEO <sub>14</sub> | 5.92           | 840.6               | 89.1*             | 25               | 40                     | NPEO <sub>14</sub> | 6.54           | 854.6               | 177               | 30               | 30                     |
|                    |                |                     | 133.2             |                  | 35                     |                    |                |                     | 133.0*            |                  | 40                     |
| OPEO <sub>15</sub> | 5.90           | 884.7               | 89.1*             | 25               | 40                     | NPEO <sub>15</sub> | 6.51           | 898.7               | 291.1             | 30               | 30                     |
|                    |                |                     | 133.2             |                  | 40                     |                    |                |                     | 133.2*            |                  | 40                     |
| OPEO <sub>16</sub> | 5.88           | 473.2               | 89.0*             | 30               | 30                     | NPEO <sub>16</sub> | 6.48           | 479.8               | 89.3*             | 30               | 24                     |
|                    |                |                     | 408.8             |                  | 10                     |                    |                |                     | 133.3             |                  | 20                     |
| OPEO <sub>17</sub> | 5.85           | 495.3               | 89.1*             | 10               | 30                     | NPEO <sub>17</sub> | 6.46           | 986.6               | 88.9*             | 28               | 60                     |
|                    |                |                     | 133               |                  | 30                     |                    |                |                     | 133.0             |                  | 20                     |
| OPEO <sub>18</sub> | 5.83           | 517.3               | 89.1*             | 10               | 30                     | NPEO <sub>18</sub> | 6.43           | 523.8               | 133.0             | 10               | 22                     |
|                    |                |                     | 133.2             |                  | 30                     |                    |                |                     | 89.1*             |                  | 30                     |
| OPEO <sub>19</sub> | 5.81           | 539.4               | 89.3*             | 10               | 30                     | NPEO <sub>19</sub> | 6.40           | 1074.7              | 89.1*             | 20               | 50                     |
|                    |                |                     | 133.2             |                  | 30                     |                    |                |                     | 133.2             |                  | 50                     |
| OPEO <sub>20</sub> | 5.79           | 561.4               | 89.5*             | 10               | 35                     | NPEO <sub>20</sub> | 6.34           | 568.0               | 132.9             | 20               | 27                     |
|                    |                |                     | 132.6             |                  | 20                     |                    |                |                     | 89.0*             |                  | 30                     |

\* indicates quantitative ion.

**Table S2.** Validated parameters of APEO<sub>3-20</sub> in spiked tea samples.

| Analyte            | Spiked level (µg/kg) | Matrix standard curve | R <sup>2</sup> | Recovery % | RSD% (n=5) | LOQ (µg/kg) | Analyte            | Spiked level (µg/kg) | Matrix standard curve | R <sup>2</sup> | Recovery % | RSD% (n=5) | LOQ (µg/kg) |
|--------------------|----------------------|-----------------------|----------------|------------|------------|-------------|--------------------|----------------------|-----------------------|----------------|------------|------------|-------------|
| OPEO <sub>3</sub>  | 0.024                | y =                   | 0.9989         | 98.6       | 3.4        | 0.024       | NPEO <sub>3</sub>  | 2.79                 | y = 49852 x           | 0.9993         | 110.7      | 6.3        | 2.79        |
|                    | 0.24                 | 263254 x + 2715       |                | 83.0       | 2.8        |             |                    | 27.85                | x + 30818             |                | 79.8       | 5.1        |             |
|                    | 0.47                 |                       |                | 88.4       | 6.9        |             |                    | 55.70                |                       |                | 83.0       | 3.5        |             |
| OPEO <sub>4</sub>  | 0.092                | y =                   | 0.9980         | 101.4      | 8.1        | 0.092       | NPEO <sub>4</sub>  | 5.01                 | y = 20380 x           | 0.9993         | 107.1      | 6.7        | 5.01        |
|                    | 0.92                 | 109203 x + 2934       |                | 87.0       | 3.1        |             |                    | 50.10                | x + 19496             |                | 85.2       | 4.6        |             |
|                    | 1.84                 |                       |                | 92.8       | 6.0        |             |                    | 100.20               |                       |                | 90.5       | 4.4        |             |
| OPEO <sub>5</sub>  | 0.54                 | y = 23913 x + 2570    | 0.9990         | 103.3      | 10.8       | 0.54        | NPEO <sub>5</sub>  | 4.99                 | y = 12188 x + 15110   | 0.9993         | 101.3      | 2.9        | 4.99        |
|                    | 5.37                 |                       |                | 88.7       | 4.3        |             |                    | 49.90                |                       |                | 87.2       | 4.4        |             |
|                    | 10.73                |                       |                | 93.7       | 5.8        |             |                    | 99.80                |                       |                | 93.7       | 2.0        |             |
| OPEO <sub>6</sub>  | 1.31                 | y = 12685 x + 8309    | 0.9949         | 104.1      | 11.9       | 1.31        | NPEO <sub>6</sub>  | 3.75                 | y = 12123 x + 1432    | 0.9999         | 98.4       | 7.5        | 3.75        |
|                    | 13.13                |                       |                | 87.8       | 4.8        |             |                    | 37.50                |                       |                | 91.9       | 5.0        |             |
|                    | 26.26                |                       |                | 89.2       | 5.0        |             |                    | 75.00                |                       |                | 86.3       | 3.2        |             |
| OPEO <sub>7</sub>  | 2.39                 | y = 11890 x + 6313    | 0.9988         | 92.2       | 5.9        | 2.39        | NPEO <sub>7</sub>  | 3.86                 | y = 8074 x + 10458    | 0.9982         | 99.5       | 2.4        | 3.86        |
|                    | 23.88                |                       |                | 86.6       | 2.9        |             |                    | 38.60                |                       |                | 92.3       | 4.6        |             |
|                    | 47.76                |                       |                | 91.9       | 4.9        |             |                    | 77.20                |                       |                | 84.9       | 4.3        |             |
| OPEO <sub>8</sub>  | 3.29                 | y =                   | 0.9989         | 95.0       | 4.6        | 3.29        | NPEO <sub>8</sub>  | 3.54                 | y = 10035 x + 4451    | 0.9997         | 104.5      | 4.3        | 3.54        |
|                    | 32.90                | 263254 x + 2715       |                | 91.2       | 4.9        |             |                    | 35.35                |                       |                | 83.0       | 6.2        |             |
|                    | 65.80                |                       |                | 89.0       | 7.6        |             |                    | 70.70                |                       |                | 87.9       | 6.6        |             |
| OPEO <sub>9</sub>  | 5.16                 | y = 8207 x + 10957    | 0.9987         | 97.5       | 4.2        | 5.16        | NPEO <sub>9</sub>  | 4.29                 | y = 7291 x + 6178     | 0.9996         | 100.4      | 4.1        | 4.29        |
|                    | 51.61                |                       |                | 88.7       | 4.2        |             |                    | 42.85                |                       |                | 89.6       | 6.4        |             |
|                    | 103.22               |                       |                | 90.9       | 5.7        |             |                    | 85.70                |                       |                | 88.3       | 4.6        |             |
| OPEO <sub>10</sub> | 5.83                 | y = 8009 x + 11700    | 0.9987         | 93.5       | 5.5        | 5.83        | NPEO <sub>10</sub> | 4.64                 | y = 7108 x + 3919     | 0.9997         | 100.1      | 6.8        | 4.64        |
|                    | 58.26                |                       |                | 90.7       | 5.7        |             |                    | 46.35                |                       |                | 86.7       | 5.3        |             |
|                    | 116.52               |                       |                | 93.3       | 3.9        |             |                    | 92.70                |                       |                | 92.2       | 5.8        |             |
| OPEO <sub>11</sub> | 6.27                 | y = 7754 x + 15942    | 0.9973         | 98.5       | 7.7        | 6.27        | NPEO <sub>11</sub> | 4.13                 | y = 6815 x + 5285     | 0.9992         | 98.6       | 7.8        | 4.13        |
|                    | 62.69                |                       |                | 87.4       | 5.3        |             |                    | 41.25                |                       |                | 89.4       | 6.6        |             |
|                    | 125.38               |                       |                | 90.8       | 6.5        |             |                    | 82.50                |                       |                | 89.2       | 4.1        |             |
| OPEO <sub>12</sub> | 5.86                 | y = 8177 x + 15620    | 0.9974         | 93.3       | 5.6        | 5.86        | NPEO <sub>12</sub> | 3.74                 | y = 6052 x + 3328     | 0.9991         | 96.9       | 3.9        | 3.74        |
|                    | 58.57                |                       |                | 88.0       | 7.4        |             |                    | 37.35                |                       |                | 82.0       | 5.6        |             |
|                    | 117.13               |                       |                | 91.9       | 6.5        |             |                    | 74.70                |                       |                | 92.9       | 3.6        |             |
| OPEO <sub>13</sub> | 5.36                 | y = 9044 x + 10924    | 0.9986         | 95.3       | 5.4        | 5.36        | NPEO <sub>13</sub> | 3.06                 | y = 3212 x + 1279     | 0.9999         | 99.6       | 13.0       | 3.06        |
|                    | 53.62                |                       |                | 85.6       | 5.3        |             |                    | 30.55                |                       |                | 88.1       | 6.4        |             |
|                    | 107.24               |                       |                | 93.2       | 8.9        |             |                    | 61.10                |                       |                | 91.2       | 5.4        |             |
| OPEO <sub>14</sub> | 5.20                 | y =                   | 0.9989         | 93.6       | 5.5        | 5.20        | NPEO <sub>14</sub> | 2.46                 | y = 1878 x + 660      | 0.9998         | 98.3       | 4.2        | 2.46        |
|                    | 52.00                | 263254 x + 2715       |                | 84.3       | 4.3        |             |                    | 24.60                |                       |                | 79.1       | 3.9        |             |
|                    | 104.00               |                       |                | 87.8       | 7.4        |             |                    | 49.20                |                       |                | 89.4       | 6.2        |             |

|                    |       |                           |      |      |      |                    |       |                           |       |      |      |
|--------------------|-------|---------------------------|------|------|------|--------------------|-------|---------------------------|-------|------|------|
| OPEO <sub>15</sub> | 3.81  | $y = 9334 \times 0.9992$  | 89.2 | 6.9  | 3.81 | NPEO <sub>15</sub> | 1.48  | $y = 5867 \times 0.9999$  | 107.2 | 9.8  | 1.48 |
|                    | 38.07 | + 6486                    | 83.8 | 7.0  |      |                    | 14.80 | + 233                     | 85.5  | 4.0  |      |
|                    | 76.13 |                           | 88.8 | 6.6  |      |                    | 29.60 |                           | 91.3  | 5.2  |      |
| OPEO <sub>16</sub> | 2.24  | $y = 5616 \times 0.9999$  | 89.0 | 8.1  | 2.24 | NPEO <sub>16</sub> | 0.86  | $y = 8816 \times 0.9993$  | 100.1 | 8.0  | 0.86 |
|                    | 22.43 | + 163                     | 72.6 | 3.8  |      |                    | 8.55  | + 1169                    | 78.4  | 12.8 |      |
|                    | 44.85 |                           | 82.9 | 14.5 |      |                    | 17.10 |                           | 90.4  | 11.9 |      |
| OPEO <sub>17</sub> | 1.27  | $y = 12949 \times 0.9999$ | 83.2 | 9.3  | 1.27 | NPEO <sub>17</sub> | 0.61  | $y = 8572 \times 0.9978$  | 90.9  | 16.9 | 0.61 |
|                    | 12.75 | x + 552                   | 78.5 | 7.1  |      |                    | 6.05  | + 1370                    | 84.1  | 11.9 |      |
|                    | 25.49 |                           | 88.8 | 2.1  |      |                    | 12.10 |                           | 83.3  | 11.6 |      |
| OPEO <sub>18</sub> | 0.56  | $y = 32169 \times 0.9999$ | 77.8 | 6.7  | 0.56 | NPEO <sub>18</sub> | 0.43  | $y = 5821 \times 0.9997$  | 105.2 | 15.4 | 0.43 |
|                    | 5.56  | x - 1062                  | 78.9 | 2.4  |      |                    | 4.25  | + 293                     | 87.5  | 3.7  |      |
|                    | 11.12 |                           | 81.6 | 7.2  |      |                    | 8.50  |                           | 91.0  | 7.3  |      |
| OPEO <sub>19</sub> | 0.63  | $y = 23701 \times 0.9995$ | 76.6 | 12.5 | 0.63 | NPEO <sub>19</sub> | 0.27  | $y = 9757 \times 0.9998$  | 75.6  | 7.9  | 0.27 |
|                    | 6.33  | x + 1129                  | 70.3 | 4.8  |      |                    | 2.65  | + 228                     | 81.5  | 2.4  |      |
|                    | 12.66 |                           | 77.9 | 3.6  |      |                    | 5.30  |                           | 87.2  | 2.0  |      |
| OPEO <sub>20</sub> | 0.17  | $y = 23593 \times 0.9988$ | 66.9 | 1.5  | 0.17 | NPEO <sub>20</sub> | 0.16  | $y = 23166 \times 0.9999$ | 74.2  | 13.3 | 0.16 |
|                    | 1.70  | x + 611                   | 61.8 | 7.5  |      |                    | 1.62  | + 375                     | 66.9  | 13.6 |      |
|                    | 3.40  |                           | 72.1 | 3.1  |      |                    | 3.24  |                           | 62.9  | 16.9 |      |

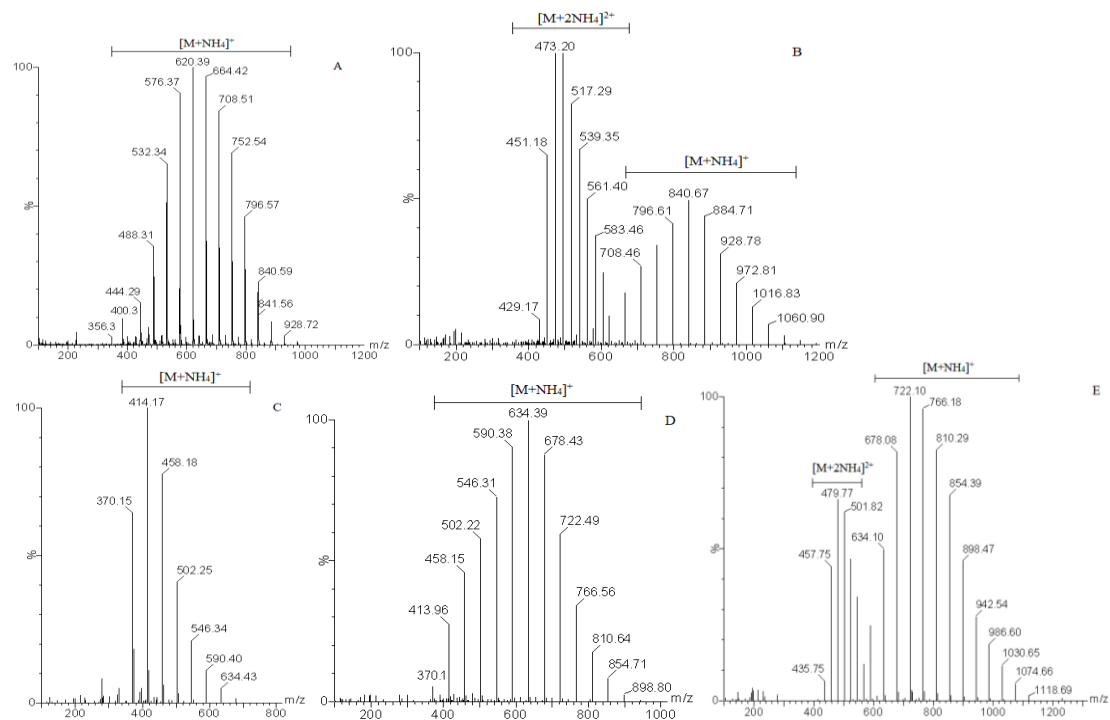

**Figure S1.** Full-scan mass spectra of (A) OPEO (9-10) ( $n_{EO} = 3-15$ ), (B) OPEO (16) ( $n_{EO} = 9-20$ ), (C) NPEO (4) ( $n_{EO} = 9-11$ ), (D) NPEO (9-10) ( $n_{EO} = 3-15$ ), and (E) NPEO (14) ( $n_{EO} = 6-20$ ) in 5 mg/kg standards.

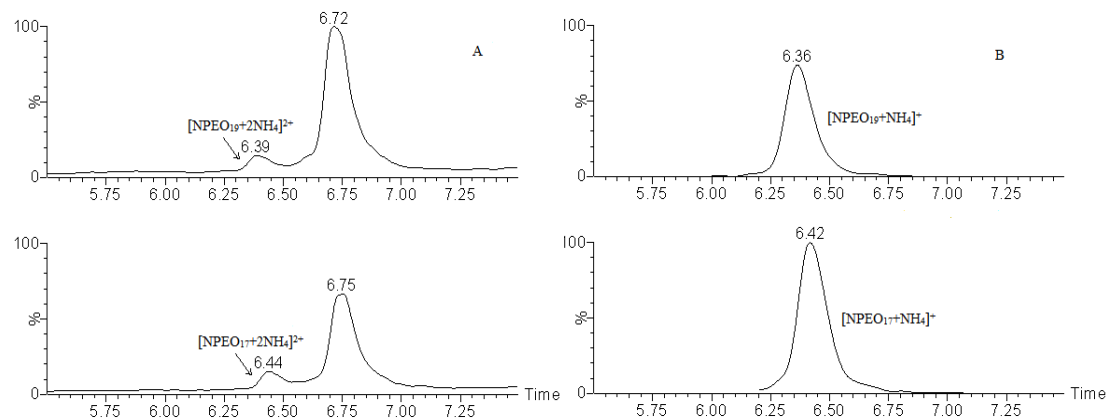

**Figure S2.** Chromatograms of (A) NPEO<sub>17</sub> and NPEO<sub>19</sub> combined two ammonium ions, and (B) NPEO<sub>17</sub> and NPEO<sub>19</sub> combined one ammonium ion.

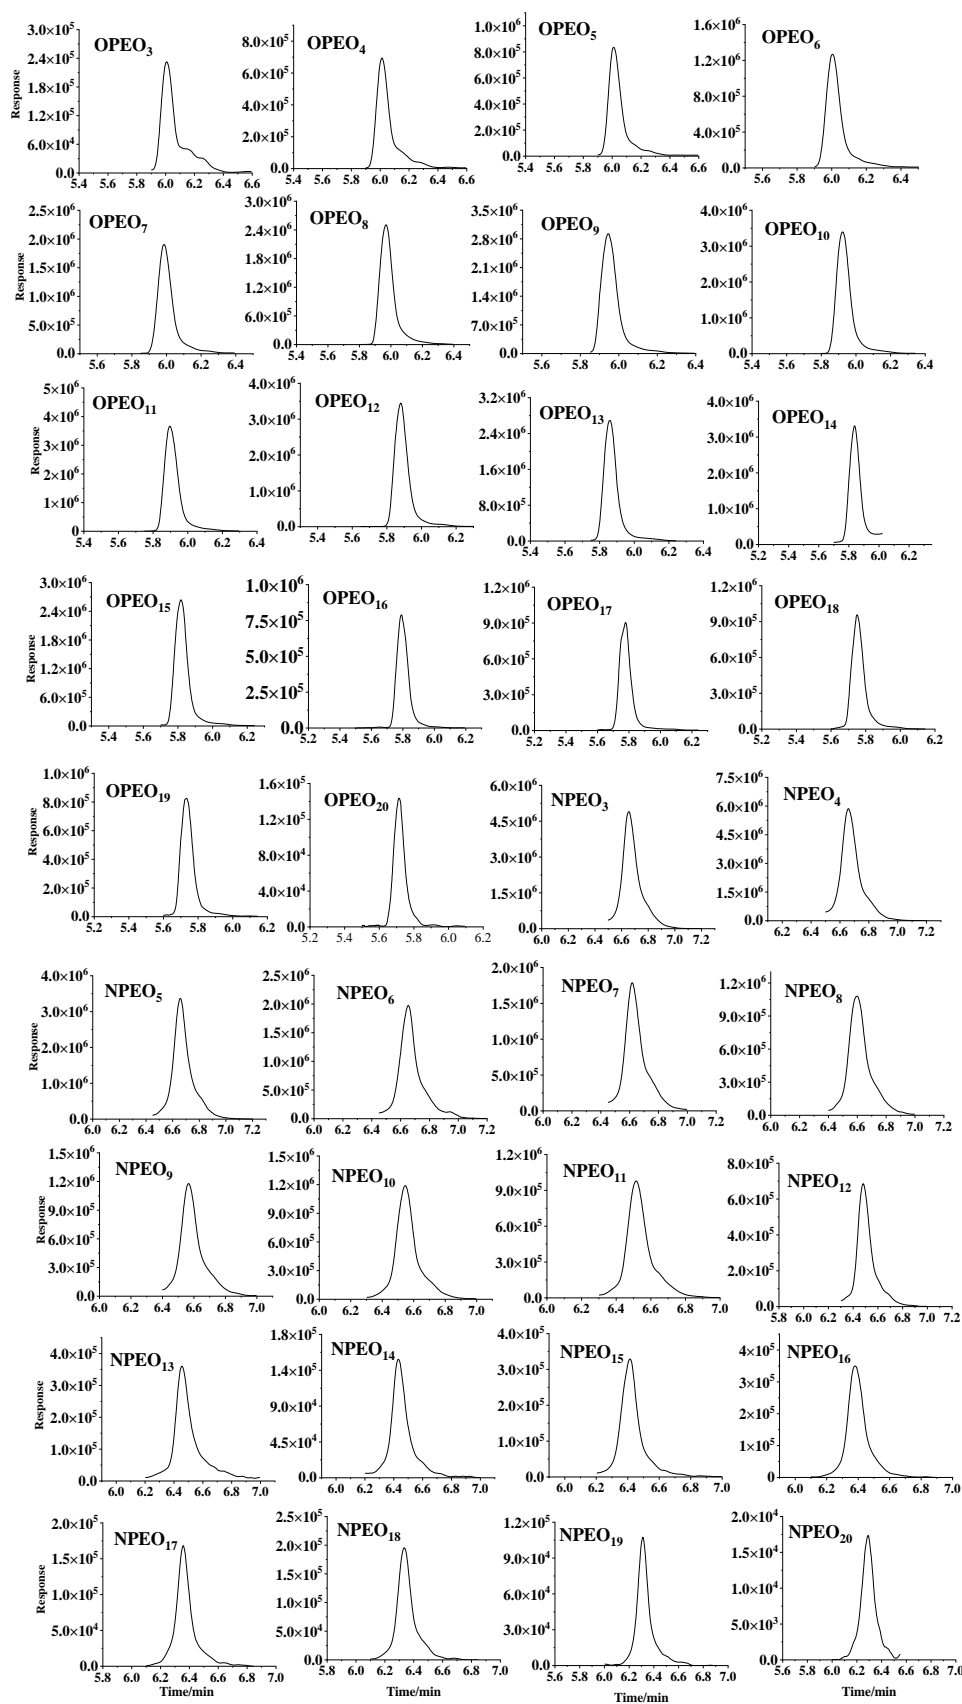

**Figure S3.** Multiple reaction-monitoring chromatograms of HPLC-MS/MS for blank tea samples spiked at the middle concentration of OPEOs and NPEOs.
